# Supplementary material
Source: publisher figshare collection journal article supplement (https://frontiersin.figshare.com/ndownloader/files/25631438)
Supplement: Supplementary file 1 [file 25631438]

## Sheet: Sheet1
			ERUPTION-DRIVEN						WATER-TRANSPORTED			COLLAPSE-DRIVEN		GLACIALLY-TRANSPORTED	WIND-TRANSPORTED	ASSESSMENT CRITERIA
	Deposit Characteristic	Rationale	Granular Fluid-Based PDC (Flow)	Fully Dilute PDC (Surge)	Spatter	Fall (vent-proximal)	Fall	Lava Breccia	Debris Flow / lahar	Fluvial	Lacustrine	Debris Avalanche	Rockfall and Small avalanches	Moraine	Aeolian	Particularly useful for?	A. Useful as a standalone criteria? (Yes = 2, No = 0)	B. If present in original deposit, will be observed in most outcrops regardless of scale or preservation state (Yes = 1, No = 0)	Usefulness' Score = A + B
DEPOSIT LAYERING	Individual thick layer (>1m)	Shows a large-scale event	Maybe: Common but not essential	No: Typically thinner and often part of stratified deposit	Maybe: Common but not essential	Maybe: Common but not essential	No: Usually thinner	Maybe: Common but not essential	Maybe: Common but not essential	No	No: Can occur over a very long time, but typically layered deposit	Maybe: Common but not essential	Maybe: Common but not essential	Maybe: Common but not essential	Maybe: Can occur following very long-term deposition of fine material	Helps distinguish between surge and flow, but thin flow deposits do also occur	No. Many processes can produce both thicker or thinner deposits	Yes	1
	Layer is part of stratified deposit with multiple texturally similar thin layers (mm to 10's of cm)	Shows repeating events or transport in a dilute PDC	No	Yes	Maybe	Maybe	Yes: Single eruption may produce only one layer, but tephras from multiple eruptions frequently appear in sequence	No	No	Yes	Yes	No	No	No	Yes	Helps distinguish between surge and flow in otherwise similar deposits	Yes. Essentially rules out flow	Yes	3
LAYER GEOMETRY	Layer mantles clearly undulating topography with even thickness (if sufficent outcrop to see this)	Characteristic of deposits formed by vertical settling as opposed to lateral transport	No	Maybe: At outcrop scale thickness variations may not be apparent	Yes: Can also be present on steep slopes	Yes: Typically clast supported lapilli	Yes	No	No	No	Yes	No	No	No	Maybe	Distinguishes vertical setlling processes vs lateral transport	Yes. Essentially rules out flow and strongly indicative of fall	No	2
	Channel or valley-filling geometry (if observable at this scale) and/or rapid lateral changes in thickness	Characteristic of deposits formed by topographically constrained lateral transport	Yes: but may not be apparent in a single outcrop. Flat topped deposit ponds in valleys and may veneer ridge crests due to high mobility	Maybe: Somewhat topographically constrained but less so than pyroclastic flows	No	No	No	Maybe	Yes: but may not be apparent in a single outcrop.	Yes: Typically channellised	No	Maybe	Maybe	Maybe: Likely to form positive topography rather than fill channels but the distinction may not be observable at outcrop scale.	No	Distinguishes channelised vs non-channelised transport	Yes	No	2
	Deposit forms a hummock(s) with significant topography (metres) on its upper surface	Characteristic of deposits formed by en-mass transport	No	No	No	No	No	No	No: Can have somewhat humocky surface but unlikely to have very significant topography	No	No	Yes: Hummocky topography is characteristic of debris avalanche deposits	Maybe	Yes: Moraines create positive relief and may appear as hummocks	No	This is a key characteristic of debris avalanche deposits	Yes. Strongly suggests debris avalanche	No	2
LAYER GRADING	Normal coarse-tail grading of lithic fraction	Coarse-tail grading means only the larger clasts are graded, often in a finer ungraded matrix. This typically occurs during transport in a higher particle concentration flow	Yes: Common characteristic	Maybe	No	No	No	No	Maybe	Maybe	No	No	No	No	No		Yes. Indicative of dense PDC	Yes	3
	Reverse coarse-tail grading of clasts	Coarse-tail grading means only the larger clasts are graded, often in a finer ungraded matrix. This typically occurs during transport in a higher particle concentration flow	Yes: Common characteristic	Maybe	No	No	No	No	Maybe	Maybe	No	No	No	No	No		Yes. Strongly indicative of dense PDC	Yes	3
	Distinct fine grained base below coarser deposit	Deposition of a finer-grained base	Maybe	Maybe	No: Only if changes in eruption intensity produced this	No: Only if changes in eruption intensity produced this	No: Only if changes in eruption intensity produced this	No	Yes: Common characteristic	No	No	No	No	No	No	Debris flows	Yes. Strongly suggests debris flow	Yes	3
	Reverse graded near base	Basal reverse grading can occur during lateral transport in a PDC or debris flow.	Maybe	Maybe	No: Only if changes in eruption intensity produced this	No: Only if changes in eruption intensity produced this	No: Only if changes in eruption intensity produced this	No	Yes: Characteristic of debris flows not containing pumice	Maybe: if changes in flow intensity produced this	No	No	No	No	No		Yes. Indicative of debris flow	Yes	3
	Normally graded near top	Suggests waning transport capacity at end of deposition	Maybe	Maybe	No: Only if changes in eruption intensity produced this	No: Only if changes in eruption intensity produced this	No: Only if changes in eruption intensity produced this	No	Yes: Characteristic of debris flows not containing pumice	Maybe: if changes in flow intensity produced this	No	No	No	No	No		No	No	0
LAYER BEDFORMS / TRANSPORT FEATURES	Fluvial-type bedforms (steep cross beds, ripples)	Typically occur during fluvial transport	No	No: May appear similar but generally lower angle and longer wavelength	No	No	No	No	No	Yes	No	No	No	No	Maybe: Can appear very similar. Cross beds at angle of repose	Fluvial deposits	Yes	Yes	3
	Characteristic surge bedding (dunes, antidunes, low angle cross beds, pinch and swell bedding)	Typically occur during energetic low-particle concentration PDCs	No	Yes	No	No	No	No	No	No: Note it can appear similar	No	No	No	No	No	Surge deposits	Yes	No	2
	Evidence of lateral transport of significant quantities of large bomb-sized clasts (e.g. discontinuous lenses, imbrication)	Shows deposit was formed from a current with significant transporting power	Yes	Maybe: Surges tend to be finer grained	No	No	No	Yes	Yes	Maybe: Typically finer material	No	Maybe: Mostly moves as more coherent mass	Yes	Maybe	No	Shows deposit was formed from a current with significant transporting power	Yes	No	2
	Coherent patches of the deposit maintaining some element of pre-transport stratigraphy	Shows that significant parts of the material moved together en-mass from source to deposition	No	No	No	No	No	No	No	No	No	Yes: Megablocks, coloured zones, and hummocky topography	No	No	No	Debris avalanches	Yes. Strongly indicative of debris avalanches	No	2
	Parts of broken clasts in the deposit have remained close to each other and can be seen to fit back together (jigsaw fit)	Shows that significant parts of the material moved together en-mass from source to deposition. Ideally need to observe several such clasts	No	No	No	No	No	No	Maybe	No	No	Yes	No	Maybe	No	Debris avalanches	Yes. Strongly indicative of debris avalanches	No	2
DEPOSIT COMPONENTS	Abundant (e.g. >50%) clasts that appear to be from the same source (e.g. mostly monolithologic, similar surface textures, colour, mineralogy, weathering)	Magmatic and phreatomagmatic eruptions produce clasts reflecting the source magma. Phreatic eruptions sample rocks from a relatively small point source (i.e. the vent).	Yes	Yes	Yes	Yes: especially vesicular clasts with 'juvenile' textures	Yes: especially vesicular clasts with 'juvenile' textures	Yes: monolithologic	Maybe: if co-eruptive or associated with a recent eruption. Otherwise commonly heterolithologic	Maybe: if co-eruptive or associated with a recent eruption. Otherwise commonly heterolithologic	Maybe: if co-eruptive or associated with a recent eruption. May be too fine grained to determine	Maybe (at outcrop scale): Typically heterolithologic; hydrothermally altered clasts common.	Yes: if from same cliff face	Maybe (at outcrop scale): if emplaced after an eruption or significant rockfall event. Broader scale typically heterolithologic	Maybe: if co-eruptive or associated with a recent eruption. May be too fine grained to determine	Distinguishes deposits with a single dominant source	Yes. A broad way of trying to separate deposits from co-eruptive processes vs longer-term volcaniclastic processes	Yes	3
	Dominantly contains highly vesicular clasts	Vesicular clasts are characteristic of explosive volcanism	Maybe: Some types of PDC contain denser clasts or lithics	Maybe: Some types of PDC contain denser clasts or lithics	Maybe	Maybe	Maybe	No	Maybe: Depends on source material	Maybe: Depends on source material	Maybe: Depends on source material	Maybe: Depends on source material	No	Maybe: Depends on source material	Maybe: Depends on source material		No. Many clasts on a volcanic edifice are vesicular and easily transported	Yes	1
	Abundant separate crystal fraction (not part of clasts)		Yes: Crystal content can be higher in the matrix than in the pyroclasts	Yes: Crystal content can be higher in the matrix than in the pyroclasts	No	No	No	No	No	No	No	No	No	No	No		Yes. Indicative of PDCs	Yes	3
	Accretionary lapilli	Evidence of a "wet" eruption and likely co-eruptive transport and emplacement - the fragility of accretionary lapilli means they are unlikely to survive deposit reworking	Maybe: Not very likely to be preserved in high quantities during transport. Can be present in fall layers bounding the PDC	Yes: Common in wet surges	No	Maybe	Maybe. Relatively common from "wet" eruptions	No	No: Unlikely to be preserved during transport	No	No: Has occurred (lacustrine Oruanui deposits, NZ), but exceedingly rare	No	No	No	No	Wet vs dry eruptions	Yes: Can help distinguish between dense and dilute PDCs in otherwise similar deposits	No	2
DEPOSIT SORTING	Poorly Sorted / Unsorted	Distinguishes high input, transient events from longer term steady events	Yes	Maybe: Individual lamellae typically moderately/well sorted. Bulk deposit can be less well sorted	Maybe: Somewhat poorly sorted in very proximal areas	Maybe: Somewhat poorly sorted in very proximal areas	No: Moderate-to-good sorting should be apparent	Maybe: Somewhat poorly sorted	Yes: Can be coarser grained and more poorly sorted than pyroclastic flows	No: Typically well sorted	No: Well sorted	Yes	Yes	Yes	No: Typically well sorted	Identifying high input transient events	Yes. Broadly separates high input transient events from longer term volcaniclastic processes	Yes	3
CLAST SIZES	Abundant bomb-sized clasts	Distinguishes higher vs lower energy processes	Yes: Typically abundant	Maybe: Mostly ash and/or lapilli	Yes	Yes	No: Typically mostly lapilli or ash further from source	Yes	Yes: Common, can exceed 1m	No	No	Yes	Yes	Yes	No	Identifying higher energy processes	No	Yes	1
	Mostly ash or lapilli sized clasts	Reflects either finer material at source (e.g. from phreatomagmatic fragmentation), lower energy erosion and transport processes (e.g. fluvial, aolian), or size fractionation with greater distances from source (e.g. tephra).	Maybe: Especially with increasing distance from source	Yes	No: Likely to have bombs	No: Likely to have bombs	Yes	No: Many bomb-sized clasts	Maybe	Yes	Yes: Often very fine	No	No	No	Yes: Typically very fine		No	Yes	1
	Fine-grained matrix within coarser deposit	Shows very poor sorting during transport, which typically occurs during higher-particle concentration transport	Yes: Typically poorly sorted. But absence of fines does not proclude a PDC origin	Maybe: Whole deposit is often finer grained ash and lapilli	No	No: Clast supported with limited fines	No: Clast supported with limited fines	No: Low proportion of material finer than 2mm. May have open framework	Yes: Silt/clay-size fraction may be present. Absence of fines does not preclude a debris flow origin	No: May contain abundant fine material, but typically well-sorted	No: May contain abundant fine material, but typically well-sorted	Yes	No: Clast supported	Maybe: Poorly sorted deposit with range of grain sizes	No: Whole deposit is likely to be very fine grained	Showing high-particle concentration transport	Yes	Yes	3
CLAST TEXTURAL FEATURES	Most clasts have a clear skin or chilled margins that extend around the entire clast	This typically forms on primary erupted clasts. If preserved around the entire clast, it suggests the clast has not broken since skin formation (during transport)	Maybe: May not be observable, and PDC deposits from phreatic explosions may not have chilled margins	Maybe: May not be observable, and PDC deposits from phreatic explosions may not have chilled margins	Maybe: Clasts may appear to have a 'skin' but not a pronounced chilled margin	Maybe: May not be observable, and PDC deposits from phreatic explosions may not have chilled margins	Maybe: May not be observable, and PDC deposits from phreatic explosions may not have chilled margins	Maybe: Clasts may appear to have a 'skin' but not a pronounced chilled margin	Maybe: Depends on source material	Maybe: Depends on source material	No: Likely too fine grained to observe	Maybe: Depends on source material	No: Clasts are broken from source rock	Maybe: Depends on source material	No: Likely too fine grained to observe	Showing the clast was originally hot (i.e. erupted) and has not broken since it cooled. Implies only limited reworking if any.	Yes	Yes	3
	Striated clasts (from abrasion during transport) in the deposit	Striations form as clasts are dragged against other rock during transport.	Maybe: Unlikely to be abundant	No	No	No	No	No	Maybe: Unlikely to be abundant	No	No	No	No	Maybe: Unlikely to be abundant	No		No	No	0
	Most clasts are abrasively rounded (noting that deposit is in proximal-medial locations)	Suggests transport with significant particle collisions to produce rapid rounding.	Yes: Some rounding during transport	Yes: Some rounding during transport	No	No	No	No	Yes: Some rounding during transport	Yes: Some rounding during transport	Yes: Very fine grained	Maybe: Depends on source material rather than occuring during transport	No: generally angular	Maybe: Depends on source material	Maybe: Some rounding during transport. Very fine grained		No	Yes	1
DEGASSING / DEWATERING	Elutriation / openwork pipes (can be depleted in fines and enriched in crystal or lithic components)	Degassing structures are characteristic of PDC deposits	Yes: Very characteristic of PF deposits	Maybe	No	No	No	No	Maybe: May have dewatering or gas escape structures	No	No	No	No	No	No	Dense PDCs	Yes	No	2
EVIDENCE OF HIGH TEMPERATURES DURING/AFTER TRANSPORT	Prismatically fractured small bomb-sized clasts in-situ (ie clast is still all together)	Prismatic fracturing occurs as hot clasts cool. If this happens during transport the clast should then break apart. Therefore indicates the clasts remained hot at the time of deposition. Smaller bombs suggest the whole deposit was emplaced hot, whereas larger bombs could remain hot even when transported in a cooler fluid	Yes	Maybe	Yes	Maybe	No	Yes	No: 'Hot' lahars can occur, and larger clasts in particular may retain their heat. Smaller clasts will typically cool before deposition	No	No	Maybe: Can occur if cryptodome material was involved in the debris avalanche	No	No	No	Distinguishes high deposit temperatures at the time of deposition	Yes	Yes	3
	Presence of charcoal fragments incorporated into the deposit	Charcoal is evidence of high temperatures, while incorporation into the deposit suggests lateral transport. However charcoal can be easily reworked (e.g from a nearby PDC deposit) and incorporated into other deposits, but may not survive extensive reworking	Yes: Although many tall stratovolcanoes lack significant vegetation in proximal-medial areas	Maybe	No	No	No	No	Maybe: Wood is more likely to be charred than charcoalised. Charred wood may be present if next to a large clast. Charcoal may be present if the debris flow reworked PDC deposits	Maybe: If reworking PDC deposits	No	No	No	No	No		Yes. With the caveat that charcoal can be easily reworked. But nonetheless implies there was a high-temperature deposit emplaced nearby	No	2
	Widespread pinkish or reddish-gray deposit alteration (not just individual clasts), particularly at the top of the deposit	Evidence of high deposit temperatures after deposition	Yes: Characteristic of PF deposits	No: Not likely due to fine grain sizes and thin layers	Maybe: Clasts can be oxidised red but this can occur prior to deposition	Maybe: Clasts can be oxidised red but this can occur prior to deposition	No	Maybe: Clasts can be oxidised red but this can occur prior to deposition	No	No	No	No	No	No	No	Distinguishes high deposit temperatures at the time of deposition	Yes	No	2
	Aligned magnetic fabric of clasts determined by portable magnetometer	Shows that the deposit was emplaced at temperatures above the curie point of the magnetic minerals	Yes: However not all PDCs will be emplaced above the curie point of their magnetic minerals.	Maybe	Yes	Maybe	No	Yes	Maybe: Debris flows may carry hot clasts and produce similar results; but more usually have randomly aligned NRM, or may have a lower proportion of clasts showing aligned NRM.	No	No	Maybe: Can occur if significant cryptodome material was involved in the debris avalanche	No	No	No	Distinguishes high deposit temperatures at the time of deposition	Yes	Yes	3
	Deposit welding	Shows the deposit was emplaced at high enough temperatures to fuse its components	Yes: Characteristic feature if present, but many pyroclastic flows are unwelded. Can be welded a long way from possible source	No	Yes: Should be relatively proximal to a possible vent	Maybe	No	Yes	No	No	No	No	No	No	No	Distinguishes high deposit temperatures at the time of deposition	Yes	Yes	3
OTHER	Deposit location in relation to other deposits or features	Surrounding features may help identify or eliminate different processes	Depost does not need to be located close to a plausible source for the main clast types	Depost does not need to be located close to a plausible source for the main clast types	Located near a plausible vent source	Located near a plausible vent source	Commonly associated with a larger sequence of other distal tephras	Associated with lava flow cores.	Depost does not need to be located close to a plausible source for the main clast types	Associated with other fluvial/lacustrine deposits	Associated with other fluvial/lacustrine deposits	Depost does not need to be located close to a plausible source for the main clast types	Associated with cliff faces	Associated with locations of present or past glaciers	Not associated with fluvial/lacustrine deposits	N/A	Yes: Evidence from the surrounding environment should always be considered	No	2
Caption:	Key deposit characteristics resulting from most common volcaniclastic processes. Criteria are assessed on their usefulness as standalone criteria for identifying particular volcaniclastic processes (scored from 0 to 2), and on their ability to be observed in any deposit (scored from 0 to 1). All criteria with a total ’usefulness’ score ≥ 2 are included in the final assessment scheme (Figure 3). (…
